# Supplementary material for: Cost-Effectiveness of Thoracotomy Approach for the Implantation of a Centrifugal Left Ventricular Assist Device
Source: PubMed Central journal article supplement — ASAIO J. 2020 Jul 1;66(8):855–61. doi: 10.1097/MAT.0000000000001209 (PMC7386860; doi:10.1097/mat.0000000000001209), 2020-07-01

**Cost-Effectiveness of Thoracotomy Approach for The Implantation of a  
Centrifugal Left Ventricular Assist Device**

Table S1 Baseline Characteristics of Subjects in the LATERAL Trial (N = 144)

| Baseline characteristics               | Mean $\pm$ SD or % |
|----------------------------------------|--------------------|
| Age (years)                            | 54.2 $\pm$ 11.5    |
| Male sex (%)                           | 77.1%              |
| Race (%)                               |                    |
| Caucasian                              | 62.5%              |
| Black/African American                 | 20.8%              |
| Other                                  | 16.7%              |
| Body mass index (kg/m <sup>2</sup> )   | 27.1 $\pm$ 5.1     |
| Body surface area (m <sup>2</sup> )    | 2.0 $\pm$ 0.26     |
| <b>INTERMACS</b>                       |                    |
| 1                                      | 3.5%               |
| 2                                      | 31.3%              |
| 3                                      | 47.2%              |
| 4                                      | 15.3%              |
| 5+                                     | 2.7%               |
| Bridge to transplant                   | 74%                |
| Bridge to transplant possible/eligible | 26%                |
| Ischemic cause of heart failure        | 32.6%              |
| Previous cardiac surgery               | 22.9%              |

|                                            |             |
|--------------------------------------------|-------------|
| Duration of heart failure >2 years         | 72.9%       |
| History of atrial arrhythmia               | 30.6%       |
| History of major stroke                    | 4.9%        |
| Chronic renal disease                      | 18.8%       |
| Mean arterial blood pressure (mm Hg)       | 79.5 ± 10.5 |
| Left ventricular ejection fraction <20%    | 61.1%       |
| Creatinine (mg/dl)                         | 1.3 ± 0.7   |
| Central venous pressure (mm Hg)            | 10.4 ± 5.6  |
| Cardiac index (liters/min/m <sup>2</sup> ) | 2.1 ± 0.54  |

---

INTERMACS: Interagency Registry for Mechanically Assisted Circulatory

Support

Table S2 Results – Scenario Analysis – Medical Management Survival HR:0.15

|                    | Costs   | QALYs  |
|--------------------|---------|--------|
| LVAD               | 551,934 | 9.77   |
| Medical Management | 273,355 | 5.23   |
| Difference         | 278,579 | 4.54   |
| ICER (\$/QALY)     |         | 61,336 |

LVAD: Left Ventricular Assist Device; ICER: Incremental Cost-Effectiveness

Ratio; QALY: Quality Adjusted Life Years

Table S3 Results – Scenario Analysis – Medical Management Survival HR:0.10

|                    | Costs   | QALYs  |
|--------------------|---------|--------|
| LVAD               | 551,934 | 9.77   |
| Medical Management | 216,347 | 4.13   |
| Difference         | 335,586 | 5.64   |
| ICER (\$/QALY)     |         | 59,527 |

LVAD: Left Ventricular Assist Device; ICER: Incremental Cost-Effectiveness

Ratio; QALY: Quality Adjusted Life Years

Table S4 Results – Scenario Analysis – Heart Transplant Rate 20%

---

|                    | Costs   | QALYs  |
|--------------------|---------|--------|
| LVAD               | 548,833 | 9.16   |
| Medical Management | 317,382 | 5.21   |
| Difference         | 231,545 | 3.95   |
| ICER (\$/QALY)     |         | 58,545 |

---

LVAD: Left Ventricular Assist Device; ICER: Incremental Cost-Effectiveness

Ratio; QALY: Quality Adjusted Life Years

Table S5 Results – Scenario Analysis – Heart Transplant Rate 10%

---

|                    | Costs   | QALYs  |
|--------------------|---------|--------|
| LVAD               | 538,833 | 8.33   |
| Medical Management | 298,398 | 3.94   |
| Difference         | 240,436 | 4.38   |
| ICER (\$/QALY)     |         | 54,856 |

---

LVAD: Left Ventricular Assist Device; ICER: Incremental Cost-Effectiveness

Ratio; QALY: Quality Adjusted Life Years

Table S6 Results – Scenario Analysis – Sternotomy Adverse Events

|                     | Costs   | QALYs                 |
|---------------------|---------|-----------------------|
| Thoracotomy LVAD    | 551,934 | 9.77                  |
| Sternotomy AEs LVAD | 572,871 | 9.42                  |
| Difference          | -20,937 | 0.35                  |
| ICER (\$/QALY)      |         | Thoracotomy Dominates |

LVAD: Left Ventricular Assist Device; ICER: Incremental Cost-Effectiveness

Ratio; QALY: Quality Adjusted Life Years; AE: Adverse Event

Table S7. VAD and Heart Transplant Procedure Codes

|     | <b>ICD-9 Procedure Codes</b> | <b>ICD-10 Procedure Codes</b> |
|-----|------------------------------|-------------------------------|
| VAD | 37.66                        | 02HA0QZ                       |
| HT  | 37.51                        | 02YA0Z0, 02YA0Z1, 02YA0Z2     |

VAD: Ventricular Assist Device; HT: Heart Transplantation



Table S8. Adverse Event Codes used for the claim analysis

| Adverse Event       | ICD-9 Diagnosis Codes                                                      | ICD-10 Diagnosis Codes                                                                                                                                                                                                                                                                                                                                                                                                                                                                                                                                                                                                                          |
|---------------------|----------------------------------------------------------------------------|-------------------------------------------------------------------------------------------------------------------------------------------------------------------------------------------------------------------------------------------------------------------------------------------------------------------------------------------------------------------------------------------------------------------------------------------------------------------------------------------------------------------------------------------------------------------------------------------------------------------------------------------------|
| Driveline Infection | 909.3, 996.00, 996.09,<br>996.1, 996.61, 996.62,<br>998.51, 998.59, V58.89 | T81.4XXA, T81.4XXD, T81.4XXS,<br>T82.510A, T82.510D, T82.510S,<br>T82.511A, T82.511D, T82.511S,<br>T82.512A, T82.512D, T82.512S,<br>T82.513A, T82.513D, T82.513S,<br>T82.514A, T82.514D, T82.514S,<br>T82.515A, T82.515D, T82.515S,<br>T82.518A, T82.518D, T82.518S,<br>T82.519A, T82.519D, T82.519S,<br>T82.520A, T82.520D, T82.520S,<br>T82.521A, T82.521D, T82.521S,<br>T82.522A, T82.522D, T82.522S,<br>T82.523A, T82.523D, T82.523S,<br>T82.524A, T82.524D, T82.524S,<br>T82.525A, T82.525D, T82.525S,<br>T82.528A, T82.528D, T82.528S,<br>T82.529A, T82.529D, T82.529S,<br>T82.530A, T82.530D, T82.530S,<br>T82.531A, T82.531D, T82.531S, |

---

|          |                                                                             |                                                                                                                                                                                                                                                                                                                                                                                                                                                                                                            |
|----------|-----------------------------------------------------------------------------|------------------------------------------------------------------------------------------------------------------------------------------------------------------------------------------------------------------------------------------------------------------------------------------------------------------------------------------------------------------------------------------------------------------------------------------------------------------------------------------------------------|
|          |                                                                             | T82.532A, T82.532D, T82.532S,<br>T82.533A, T82.533D, T82.533S,<br>T82.534A, T82.534D, T82.534S,<br>T82.535A, T82.535D, T82.535S,<br>T82.538A, T82.538D, T82.538S,<br>T82.539A, T82.539D, T82.539S,<br>T82.590A, T82.590D, T82.590S,<br>T82.591A, T82.591D, T82.591S,<br>T82.592A, T82.592D, T82.592S,<br>T82.593A, T82.593D, T82.593S,<br>T82.594A, T82.594D, T82.594S,<br>T82.595A, T82.595D, T82.595S,<br>T82.598A, T82.598D, T82.598S,<br>T82.599A, T82.599D, T82.599S,<br>T82.7XXA, T82.7XXD, T82.7XXS |
| GI Bleed | 456.0, 456.20, 530.21,<br>535.01, 535.11, 535.21,<br>535.41, 535.51, 535.61 | I85.01, I85.11, K22.11, K29.01,<br>K29.41, K29.51, K29.61, K29.71,<br>K29.81, K29.91                                                                                                                                                                                                                                                                                                                                                                                                                       |
| RHF      | 428.9                                                                       | I50.810, I50.811, I50.812, I50.813,<br>I50.814, I50.82, I50.83, I50.84,<br>I50.89, I50.9                                                                                                                                                                                                                                                                                                                                                                                                                   |

---

GI: Gastro-Intestinal; RHF: Right Heart Failure

Table S9. Stroke MS-DRG Codes

|        | <b>MS-DRG Codes</b>          |
|--------|------------------------------|
| Stroke | 061, 062, 063, 064, 065, 069 |

Figure S1. LATERAL Survival – Actual and Weibull Model Fit

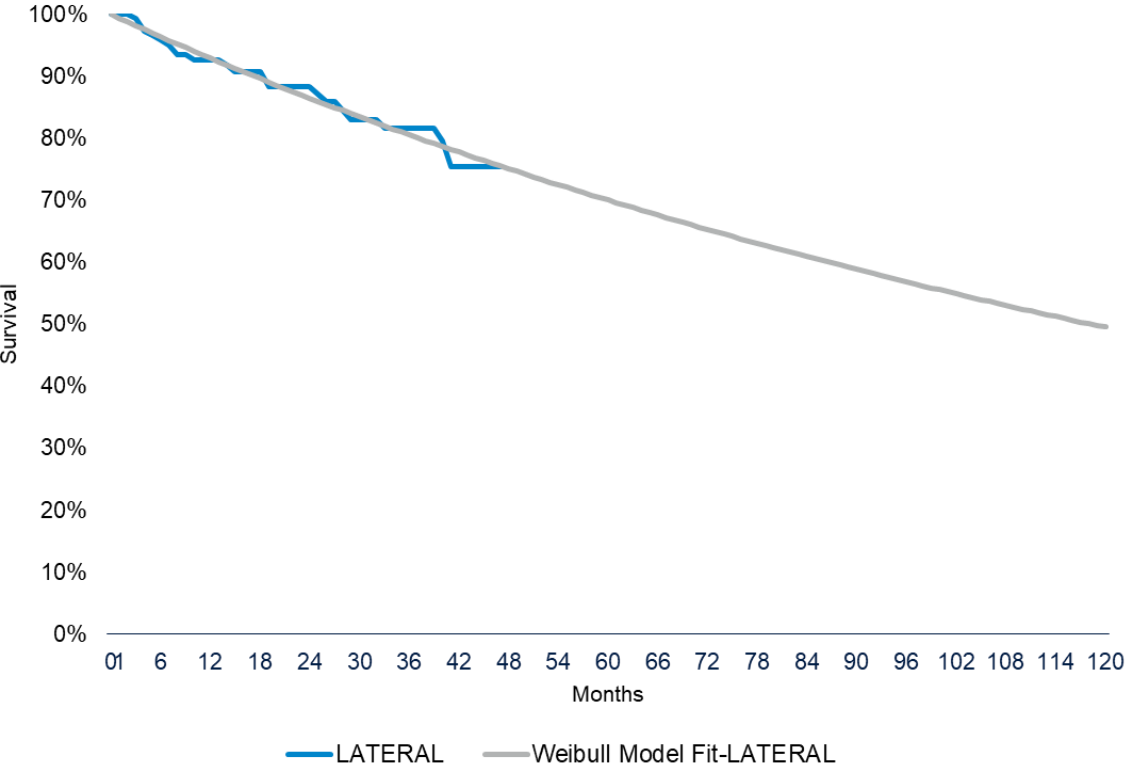

Supplement: mat-66-855-s001.pdf [file mat-66-855-s001.pdf]
